# Supplementary material
Source: publisher figshare collection journal article supplement (https://gsapubs.figshare.com/ndownloader/files/28157190)
Supplement: Supplementary file 1 [file 28157190]

## Sheet: Sheet1
Table S5 Representative electron microprobe analyses and structural formula of biotite from the biotite granites, granite porphyry dykes and MMEs
Rock type		Biotite granites																											Granite porphyry dykes								MMEs
Sample		ZK3-1-16				ZK3-1-27				ZK3-1-29				ZK10-1-13							ZK10-1-21				ZK10-1-32				GF-01				GF-08				GF-03
SiO2		36.358	36.252	36.59		35.958	36.527	36.601		35.735	36.059	36.777		40.483	40.793	40.763	40.113	40.415	40.667		36.802	36.75	37.303		35.234	35.688	35.17		35.794	35.915	35.525		35.517	34.931	35.297		35.852	34.435	36.005	35.543	35.356	35.673	34.656	35.781	35.18	35.613	35.052	35.808	36.455
TiO2		2.087	2.31	2.237		1.916	1.919	1.855		2.382	2.232	2.215		0.939	1.309	0.94	1.21	0.965	1.074		2.024	1.97	1.69		3.446	3.214	3.322		2.13	1.966	1.935		2.761	2.623	2.169		5.304	4.963	5.907	6.1	6.341	6.282	5.965	6.532	7.679	5.752	7.724	6.088	6.269
Al2O3		19.243	19.319	19.859		19.016	19.266	19.546		19.102	19.728	19.362		21.985	21.854	21.879	22.005	21.725	21.72		20.646	20.295	20.562		18.825	18.609	18.022		19.762	19.365	19.92		18.754	19.384	19.928		14.037	13.692	13.84	14.357	14.124	14.081	14.175	14.292	14.522	13.278	13.931	14.074	14.308
FeOT		21.871	21.839	20.798		22.445	21.423	21.259		21.418	20.833	20.06		14.748	14.142	14.811	15.312	14.763	15.073		19.736	20.402	20.23		21.484	20.964	20.899		22.349	21.817	21.979		21.803	22.095	22.189		17.599	17.646	20.832	16.602	16.487	18.138	16.937	15.184	15.802	16.479	18.897	16.485	16.924
MnO		0.617	0.626	0.605		0.742	0.722	0.722		0.632	0.681	0.608		1.225	1.155	1.192	1.232	1.203	1.226		0.789	0.833	0.805		0.445	0.544	0.45		0.954	0.938	0.894		0.783	0.83	0.808		0.132	0.205	0.211	0.143	0.17	0.141	0.126	0.149	0.145	0.142	0.097	0.133	0.172
MgO		3.247	3.358	3.478		3.097	3.327	3.259		3.907	3.883	3.944		1.041	1.043	1.094	0.974	1.104	1.098		2.822	2.654	2.605		4.681	4.817	4.735		3.226	3.367	3.475		3.472	3.714	3.768		11.23	10.276	10.113	11.277	10.279	11.675	13.084	12.084	10.602	11.147	11.255	11.867	11.76
CaO		-	-	-		0.024	0.03	0.014		-	-	-		-	-	0.021	-	-	-		-	-	-		-	-	-		-	0.007	0.047		0.025	0.027	0.027		-	2.205	1.861	0.019	-	0.078	0.02	0.061	0.013	0.082	0.062	0.038	0.057
Na2O		0.041	0.039	0.041		0.025	0.03	0.044		0.053	0.012	0.048		0.063	0.044	0.055	0.023	0.057	0.073		0.049	0.044	0.012		0.038	0.022	0.022		0.052	0.071	0.051		0.078	0.064	0.051		0.421	0.356	0.402	0.426	0.419	0.447	0.511	0.493	0.481	0.452	0.604	0.347	0.332
K2O		10.2	9.816	9.726		9.483	9.709	9.709		9.601	9.722	9.618		9.656	9.682	10.058	9.902	9.886	9.683		9.675	9.647	9.784		9.865	9.849	9.715		9.531	8.855	9.149		9.343	9.292	9.148		8.861	8.64	8.41	8.411	8.484	8.331	8.497	8.759	8.36	8.751	8.281	8.489	8.664
F		1.737	1.804	1.954		1.65	1.66	1.672		2	1.897	2.037		4.722	4.814	4.759	4.778	4.816	4.841		2.033	1.948	1.509		1.491	1.711	1.313		2.366	2.327	2.128		1.951	1.893	1.983		0.941	1.141	0.515	-	1.042	0.235	0.089	0.542	0.974	0.523	-	0.833	0.943
Cl		0.175	0.171	0.142		0.163	0.163	0.144		0.183	0.154	0.159		0.043	0.05	0.08	0.083	0.074	0.088		0.178	0.194	0.181		0.17	0.171	0.239		0.089	0.108	0.085		0.152	0.125	0.122		0.147	0.126	0.082	0.132	0.136	0.106	0.09	0.1	0.09	0.248	0.114	0.136	0.114
Li2O*		0.882746	0.852324	0.94933		0.767946	0.931249	0.952487		0.703945	0.796933	1.003		2.06662	2.15559	2.14698	1.96043	2.0471	2.11943		1.01017	0.99525	1.15396		0.560158	0.690456	0.54179		0.720878	0.755605	0.643675		0.641379	0.473197	0.578239		0.737524	0.330845	0.781435	0.648841	0.595172	0.686151	0.394272	0.717147	0.54466	0.668931	0.507924	0.724896	0.910585
H2O*		2.99834	2.97021	2.93239		2.99428	3.0315	3.04011		2.8399	2.93072	2.87749		1.67836	1.64277	1.66555	1.64744	1.61805	1.62602		2.88258	2.90478	3.15143		3.11243	3.0151	3.11695		2.71562	2.69412	2.8052		2.84595	2.88023	2.87261		3.43085	3.23406	3.75146	3.87945	3.32791	3.82996	3.85575	3.67156	3.4303	3.541	3.94964	3.50888	3.53623
F=O		0.72954	0.75768	0.82068		0.693	0.6972	0.70224		0.84	0.79674	0.85554		1.98324	2.02188	1.99878	2.00676	2.02272	2.03322		0.85386	0.81816	0.63378		0.62622	0.71862	0.55146		0.99372	0.97734	0.89376		0.81942	0.79506	0.83286		0.39522	0.47922	0.2163	-	0.43764	0.0987	0.03738	0.22764	0.40908	0.21966	-	0.34986	0.39606
Cl=O		0.04025	0.03933	0.03266		0.03749	0.03749	0.03312		0.04209	0.03542	0.03657		0.00989	0.0115	0.0184	0.01909	0.01702	0.02024		0.04094	0.04462	0.04163		0.0391	0.03933	0.05497		0.02047	0.02484	0.01955		0.03496	0.02875	0.02806		0.03381	0.02898	0.01886	0.03036	0.03128	0.02438	0.0207	0.023	0.0207	0.05704	0.02622	0.03128	0.02622
Total		98.6873	98.5595	98.4584		97.5507	98.004	98.0822		97.6747	98.0965	97.8164		96.6568	96.651	97.4473	97.214	96.6334	97.235		97.7519	97.7742	98.311		98.6862	98.5366	96.9393	0	98.6753	97.1835	97.7235		97.2719	97.5076	98.0799	0	98.263	96.7411	102.476	97.5085	96.2917	99.5803	98.3423	98.115	97.3926	96.4008	100.449	98.1504	100.022
Cations based on 22 oxygen atoms
Si		5.47418	5.44963	5.45739		5.48592	5.51454	5.51309		5.40451	5.41582	5.49476		5.7164	5.73396	5.71775	5.65768	5.71212	5.70949		5.48645	5.50197	5.56779		5.32645	5.37098	5.41002		5.35922	5.42654	5.36779		5.41016	5.32626	5.32969		5.37771	5.29299	5.30138	5.39967	5.37014	5.33047	5.2566	5.3462	5.27271	5.45004	5.2364	5.3457	5.33833
Al IV		2.52582	2.55037	2.54261		2.51408	2.48546	2.48691		2.59549	2.58418	2.50524		2.2836	2.26604	2.28225	2.34232	2.28788	2.29051		2.51355	2.49803	2.43221		2.67355	2.62902	2.58998		2.64078	2.57346	2.63221		2.58984	2.67374	2.67031		2.4815	2.48041	2.4017	2.57059	2.52835	2.47979	2.534	2.51676	2.5652	2.39486	2.45278	2.47627	2.46935
Tetrahedral site
Al VI		0.88884	0.872386	0.948274		0.905159	0.94256	0.982984		0.809363	0.90794	0.904172		1.37514	1.35436	1.3347	1.31558	1.33097	1.30343		1.11399	1.08299	1.18489		0.680487	0.671721	0.677291		0.846442	0.874971	0.915158		0.777008	0.809723	0.876055		-	-	-	-	-	-	-	-	-	-	-	-	-
Ti		0.2364	0.261248	0.251012		0.219915	0.21796	0.210209		0.271026	0.252203	0.248973		0.0997519	0.138425	0.0991956	0.128394	0.10261	0.11344		0.227005	0.221888	0.189772		0.39192	0.363901	0.384443		0.239926	0.223479	0.219962		0.316407	0.300895	0.246394		0.598129	0.574207	0.654086	0.696917	0.725698	0.704946	0.679879	0.734811	0.867102	0.661313	0.86841	0.683928	0.690603
Fe3+*		0.25577	0.261518	0.254487		0.269565	0.255915	0.254428		0.264446	0.255681	0.248739		0.197422	0.189721	0.196305	0.204018	0.197704	0.200238		0.249503	0.255339	0.244817		0.256637	0.252772	0.255482		0.274648	0.275945	0.273624		0.272826	0.275455	0.273848		0.33412	0.364331	0.291269	0.311086	0.379036	0.308516	0.26601	0.307575	0.373002	0.327572	0.328125	0.340821	0.3337
Fe2+*		2.49823	2.48413	2.33981		2.59428	2.44899	2.42364		2.44461	2.36117	2.25783		1.54422	1.47276	1.54117	1.60217	1.54734	1.56959		2.21118	2.29919	2.28047		2.4596	2.38588	2.43313		2.52386	2.48094	2.50382		2.50475	2.54216	2.52822		1.87363	1.90409	2.27401	1.79827	1.71527	1.95817	1.88251	1.58981	1.60774	1.78154	2.03284	1.71739	1.73896
Mn		0.0786862	0.0797083	0.0764314		0.0958853	0.0923266	0.0921157		0.0809607	0.0866347	0.0769432		0.146514	0.137514	0.141622	0.147183	0.144017	0.145794		0.0996302	0.105633	0.101772		0.0569811	0.0693465	0.0586318		0.120986	0.120045	0.114418		0.101025	0.107197	0.10334		0.0167707	0.02669	0.026315	0.0184011	0.0218708	0.0178459	0.0161879	0.018857	0.0184077	0.0184066	0.012274	0.0168178	0.0213339
Mg		0.728812	0.752541	0.773332		0.704384	0.748794	0.731814		0.880888	0.869425	0.878464		0.219136	0.218559	0.228766	0.204799	0.232615	0.229811		0.627179	0.592347	0.579644		1.05494	1.08074	1.08583		0.720063	0.758411	0.782763		0.788438	0.844243	0.848182		2.51118	2.35472	2.21984	2.554	2.32749	2.60074	2.95857	2.69164	2.36886	2.5431	2.50657	2.64107	2.56726
Ca		-	-	-		0.00392325	0.00485286	0.00225949		-	-	-		-	-	0.00315616	-	-	-		-	-	-		-	-	-		-	0.00113325	0.00760921		0.00408032	0.00441119	0.00436826		-	0.363153	0.293598	0.00309277	-	0.0124882	0.0032504	0.00976569	0.00208767	0.0134458	0.00992413	0.00607839	0.00894342
Octahedral site
Na		0.0119689	0.0113671	0.0118565		0.00739513	0.00878149	0.0128501		0.0155414	0.00349449	0.0139048		0.0172481	0.0119915	0.014958	0.00628975	0.01562	0.0198714		0.0141634	0.0127722	0.00347274		0.0111381	0.00641957	0.00656146		0.0150955	0.0207997	0.0149411		0.0230367	0.018921	0.0149309		0.122438	0.106097	0.114764	0.12548	0.123392	0.129505	0.150279	0.142821	0.139777	0.134116	0.174948	0.10044	0.0942623
K		1.95925	1.88252	1.85066		1.84574	1.87	1.86572		1.85247	1.86284	1.83328		1.73947	1.73622	1.79987	1.78175	1.78257	1.73435		1.8401	1.84257	1.86306		1.90258	1.89101	1.90651		1.82054	1.70689	1.76362		1.81564	1.80755	1.76222		1.69565	1.69428	1.57977	1.63016	1.64397	1.58816	1.64423	1.66962	1.59851	1.70852	1.57824	1.61678	1.61859
Li*		0.534511	0.515279	0.569432		0.47118	0.56541	0.576984		0.428158	0.481365	0.602664		1.17358	1.21853	1.21113	1.11201	1.16358	1.19667		0.605645	0.599233	0.69268		0.340556	0.417898	0.335166		0.434066	0.459139	0.391138		0.392908	0.290172	0.351135		0.4449	0.204516	0.462724	0.396418	0.363552	0.412333	0.240505	0.430926	0.328296	0.411694	0.305155	0.435213	0.536254
Interlayer
F		0.82715	0.857703	0.921748		0.796165	0.792627	0.796533		0.956661	0.901121	0.962563		2.10883	2.14013	2.11125	2.1314	2.15281	2.14959		0.958567	0.922392	0.71235		0.712884	0.814417	0.638787		1.1204	1.11201	1.01695		0.939932	0.912909	0.947004		0.446415	0.554692	0.239828	-	0.500559	0.11106	0.0426955	0.256128	0.461702	0.253138	-	0.39331	0.436742
Cl		0.0446557	0.0435664	0.0358947		0.0421465	0.0417064	0.0367608		0.0469066	0.0392005	0.0402615		0.0102905	0.0119113	0.0190182	0.0198405	0.0177258	0.0209391		0.0449739	0.0492247	0.0457865		0.0435557	0.0436162	0.0623081		0.0225841	0.0276561	0.0217671		0.0392408	0.0323029	0.0312208		0.0373699	0.032824	0.0204626	0.0339865	0.0350091	0.0268443	0.0231361	0.0253229	0.0228613	0.0643225	0.0288632	0.0344099	0.0282926
OH*		3.12819	3.09873	3.04236		3.16169	3.16567	3.16671		2.99643	3.05968	2.99718		1.88088	1.84796	1.86973	1.84876	1.82946	1.82947		2.99646	3.02838	3.24186		3.24356	3.14197	3.2989		2.85702	2.86033	2.96129		3.02083	3.05479	3.02177		3.51622	3.41248	3.73971	3.96601	3.46443	3.8621	3.93417	3.71855	3.51544	3.68254	3.97114	3.57228	3.53497
Fe/(Fe+Mg)		0.79074	0.784877	0.770363	#DIV/0!	0.802596	0.783191	0.785384		0.754624	0.750615	0.740486		0.88824	0.88381	0.883654	0.89816	0.882378	0.885074		0.796889	0.811766	0.813315		0.720262	0.70943	0.712321		0.795353	0.784254	0.780136		0.778902	0.76945	0.767637		0.467849	0.490667	0.536096	0.452326	0.473633	0.465685	0.420694	0.413461	0.455384	0.453357	0.485043	0.437985	0.446702
Fe3+/(Fe2++Fe3+)		0.0928724	0.0952483	0.0980946		0.0941269	0.0946115	0.0950042		0.0976157	0.0977055	0.0992347		0.113354	0.114119	0.112983	0.112955	0.113295	0.11314		0.101396	0.0999555	0.0969459		0.0944826	0.0957957	0.0950239		0.0981409	0.100093	0.0985165		0.0982242	0.0977618	0.0977309		0.15134	0.16061	0.113543	0.147479	0.180984	0.136109	0.123811	0.162105	0.188315	0.155313	0.138979	0.165591	0.161001
"-": below detection limit;
H2O* and Li2O* are calculated after Tindle and Webb (1990), Fe3+* and Fe2+* are calculated after Lin and Peng (1994), and formula calculations for biotite are based on 22 oxygen atoms.
[truncated: 6 more columns]
